# Supplementary material
Source: PubMed Central journal article supplement (PMC6825772)
Supplement: APJCP-20-775_Suppl.pdf [file APJCP-20-775_Suppl.pdf]

**Supplemental table 1.** Variables classification of gastric cancer survey in Xianyou county

| <b>Variables</b>                                    | <b>Definition</b>                      |
|-----------------------------------------------------|----------------------------------------|
| Age (year)                                          | <60=1, [60,65)=2, [65,70)=3, ≥70=4     |
| BMI                                                 | <18.5=1, [18.5,24)=2, [24,28)=3, ≥28=4 |
| H. Pylori infection                                 | No=0 Yes=1                             |
| Family history of gastric cancer                    | No=0 Yes=1                             |
| Chronic atrophic gastritis                          | No=0 Yes=1                             |
| Formal or primary education                         | No=0 Yes=1                             |
| Occupation of farmer                                | No=0 Yes=1                             |
| Married or living with a partner                    | No=0 Yes=1                             |
| Socioeconomic status over ten years ago             | Low (≤2000)=1, High (>2000)=2          |
| Socioeconomic status of now                         | Low (≤3000)=1, High (>3000)=2          |
| Smoking                                             | No=0 Yes=1                             |
| Alcohol intake                                      | No=0 Yes=1                             |
| Consumption of green tea                            | No=0 Yes=1                             |
| Eating quickly                                      | No=0 Yes=1                             |
| Irregular eating                                    | No=0 Yes=1                             |
| Consumption of very hot food                        | No=0 Yes=1                             |
| Consumption of very hard food                       | No=0 Yes=1                             |
| Consumption of very salty food                      | No=0 Yes=1                             |
| Consumption of very spicy food                      | No=0 Yes=1                             |
| Consumption of vinegar                              | No=0 Yes=1                             |
| Omission of breakfast                               | No=0 Yes=1                             |
| Consumption of pickled vegetable over three decades | No=0 Yes=1                             |
| Overeating                                          | No=0 Yes=1                             |
| Working after eating immediately                    | No=0 Yes=1                             |
| Family disharmony                                   | No=0 Yes=1                             |
| Mental stimulation or trauma                        | No=0 Yes=1                             |
